# Supplementary material for: Catechol-free ternary random copolymers for strong and repeatable underwater adhesion
Source: Royal Society of Chemistry journal article supplement (doi:10.1039/d3py00147d), 2023-01-01
Supplement: d3py00147d2.pdf [file d3py00147d2.pdf]

Supplementary information

## **Catechol-free ternary random copolymers for strong and repeatable underwater adhesion**

*Wenlian Qiu, Yi Huang, He Zhu, Qi Zhang,\* Shiping Zhu\**

School of Science and Engineering, The Chinese University of Hong Kong, Shenzhen,  
Guangdong 518172, P. R. China

**\*Correspondence:** qizhang@cuhk.edu.cn (Q. Z.); shipingzhu@cuhk.edu.cn (S. Z.)

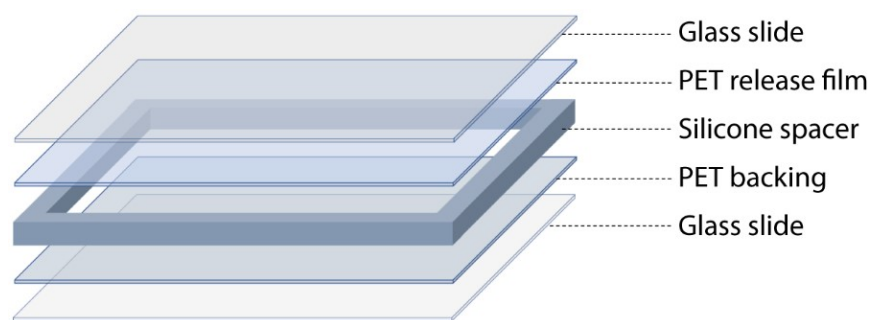

**Fig. S1** Illustration of the mold assembly.

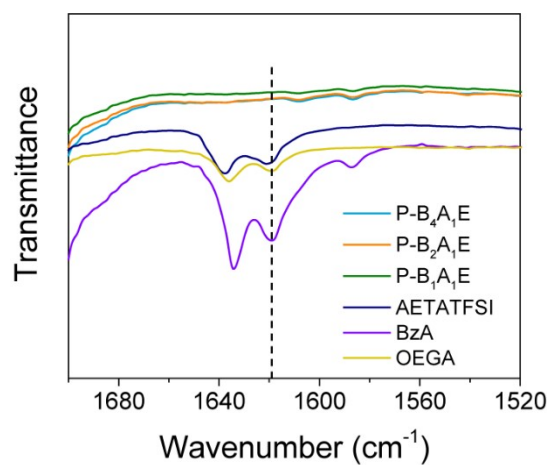

**Fig. S2** ATR-FTIR spectra of monomers and P-BAE ternary copolymers at 1700 – 1520  $\text{cm}^{-1}$ , where the C=C bond corresponds to the band at 1619  $\text{cm}^{-1}$ .

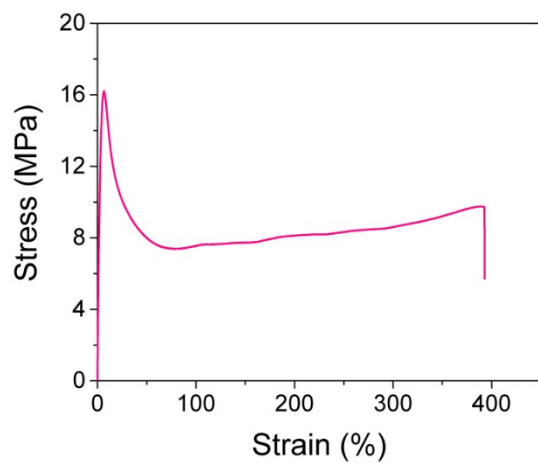

**Fig. S3** Tensile stress-strain curve of binary copolymer P-BA.

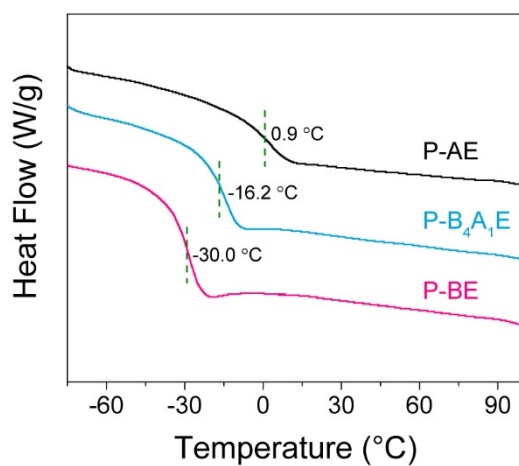

**Fig. S4** DSC curves of P-AE, P-BE, and P-B<sub>4</sub>A<sub>1</sub>E.

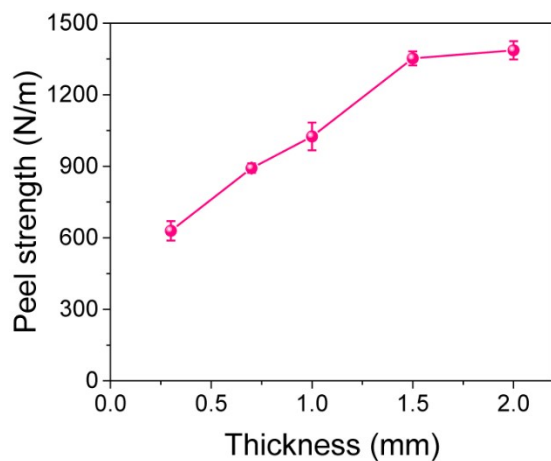

**Fig. S5** Peel strength of P-B<sub>4</sub>A<sub>1</sub>E to PET as a function of copolymer thickness.

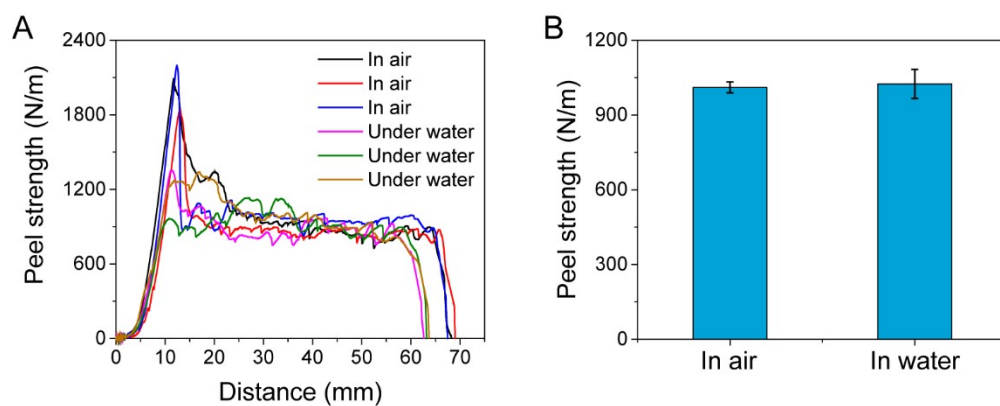

**Fig. S6** (A) Peeling strength-distance curves and (B) peeling strength of P-B<sub>4</sub>A<sub>1</sub>E to PET substrate with attachment processed in air and water.

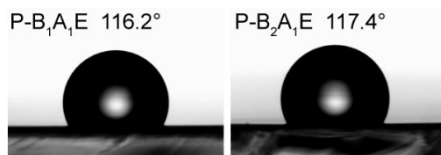

**Fig. S7** The water contact angle of P-B<sub>1</sub>A<sub>1</sub>E and P-B<sub>2</sub>A<sub>1</sub>E.

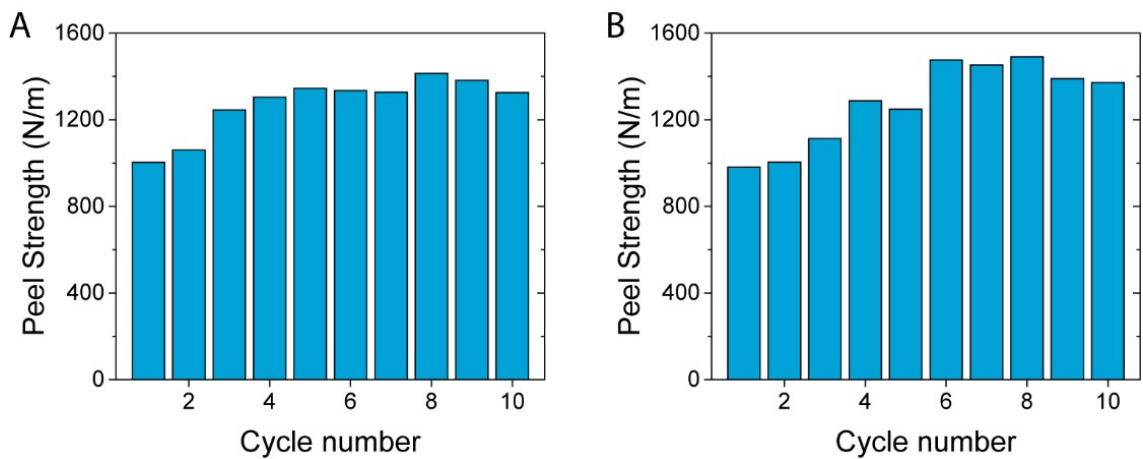

**Fig. S8** (A) & (B) Peel strength of P-B<sub>4</sub>A<sub>1</sub>E to PET substrate for 10 repeats of underwater adhesion performed on specimens prepared in different batches.

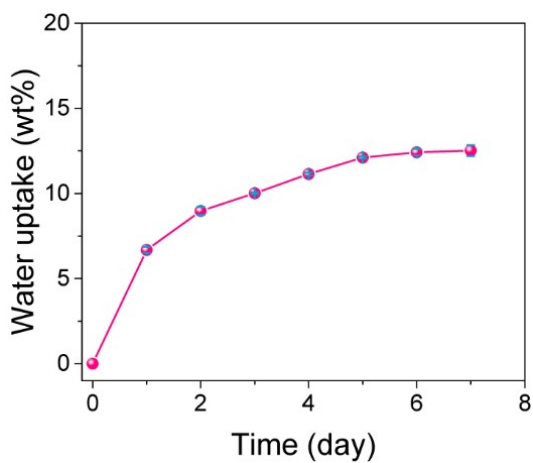

**Fig. S9** Water uptake of P-B<sub>4</sub>A<sub>1</sub>E soaked in water for different times.

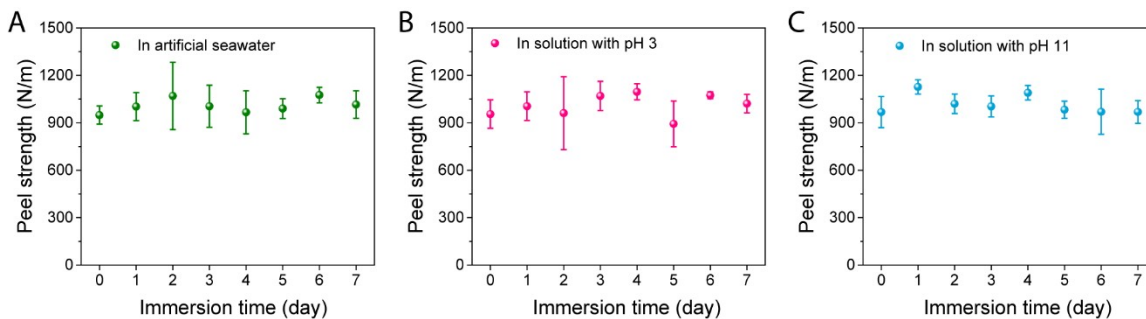

**Fig. S10** Peel strength of P-B<sub>4</sub>A<sub>1</sub>E adhesive to PET substrate as a function of the joints being immersed in different aqueous solutions for different times. (A) In artificial seawater. (B) In acid solution. (C) In basic solution.

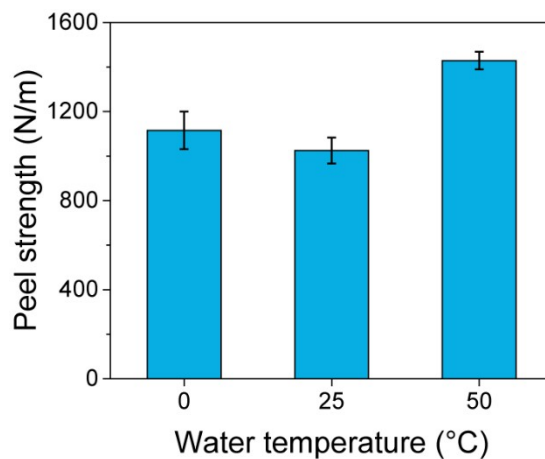

**Fig. S11** Peel strength of P-B<sub>4</sub>A<sub>1</sub>E adhesive to PET substrate with the adhering process underwater with different temperatures.

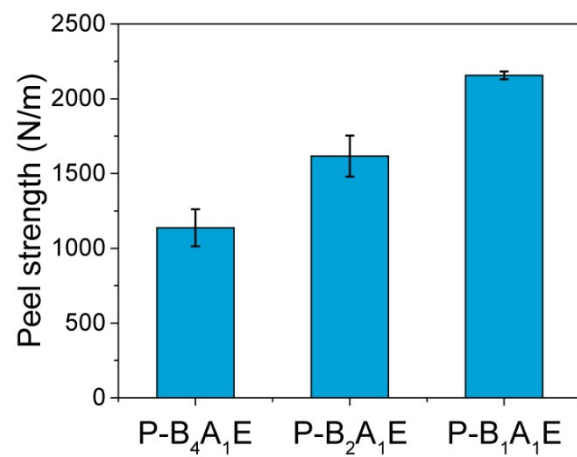

**Fig. S12** Peel strength of P-BAE copolymers to glass by processing the adhesion in air.
